# Sperm capacitation and the acrosome reaction

Lynn R.Fraser

Anatomy and Human Biology Group, King's College London, Strand, London WC2R 2LS, UK

**To achieve successful fertilization under normal circumstances *in vivo*, mammalian spermatozoa must first undergo capacitation and then the acrosome reaction, an exocytotic event that allows cells to penetrate the zona pellucida and fuse with the oocyte plasma membrane. These complex events permit spermatozoa to achieve fertilizing ability at the right time in the right place, important considerations since relatively few sperm cells actually reach the site of fertilization *in vivo*. Several mechanisms that may be involved in regulating the acquisition of fertilizing ability are considered. *In vivo*, selective pressures placed on the initial population of spermatozoa help ensure that the 'fittest' spermatozoa are able to fertilize. Since intracytoplasmic sperm injection bypasses this selection process, it is best used only in cases where spermatozoa are judged to be incapable of achieving normal fertilization *in vitro*.**

**Key words:** acrosome reaction/ $\text{Ca}^{2+}$  channels/capacitation/decapacitation factor/diacylglycerol/fertilization-promoting peptide

## Introduction

Spermatozoa have two roles to play during fertilization: (i) contribution of a haploid set of chromosomes with the paternal pattern of gene imprinting required for normal development and (ii) triggering oocyte activation and subsequent initiation of metabolic events required to support embryonic development. *In vivo*, the acquisition of fertilizing ability by mammalian spermatozoa is a relatively lengthy process, necessitated by the need for the cells to

travel a considerable distance from the site of deposition, in the lower part of the female reproductive tract, to the site of fertilization, in the upper ampullary region of the oviduct. Since relatively few sperm cells actually reach the ampulla, it is very important that they do not become fertile too quickly and thus lose the ability to interact successfully with oocytes to effect fertilization. During the past several decades, evidence has been obtained that provides at least some information about mechanisms that control sperm function and thus help to ensure that potentially fertile spermatozoa reach the site of fertilization. These mechanisms provide the focus for this article.

Since 1951 (Austin, 1951; Chang, 1951) it has been known that mammalian spermatozoa are not fertile when they leave the male reproductive tract, even though they are immediately highly motile. They require a species-dependent period of time to undergo complex changes, collectively referred to as 'capacitation' (Austin, 1952), that transform them from non-fertilizing to potentially fertilizing cells. In the capacitated state, spermatozoa can then respond to molecular signals provided by the oocyte and its associated investments (cumulus cells, zona pellucida) and undergo the acrosome reaction. The latter is an exocytotic event leading to the release of enzymes that aid penetration of the zona pellucida and to the acquisition of properties by the sperm head plasma membrane that permit fusion with the oocyte (Yanagimachi, 1994). In addition to capacitation-related changes in the sperm head, there are also changes in the sperm flagellum. These involve an alteration in the pattern of motility from progressive, with relatively low amplitude flagellar bending, to hyperactivated, with

large amplitude flagellar bending. Hyperactivated motility appears to aid progression up the oviduct, allowing spermatozoa to move away from the oviductal epithelium rather than remaining in association with these cells (DeMott and Suarez, 1992), and to provide the motive thrust needed for penetration of the zona pellucida (Katz *et al.*, 1978).

**Ionic regulation of capacitation**

The extracellular environment plays a crucial role in promoting or inhibiting functional changes in mammalian spermatozoa. *In vivo*, of course, the female reproductive tract is the site where capacitation and fertilization take place, but it is difficult to manipulate the environment and then evaluate the effects on sperm function in a precise manner. The development of culture systems that support capacitation and fertilization *in vitro* has made it possible to study in detail the requirements for the acquisition of fertilizing ability. Particular attention has been paid to the ionic composition of the culture media; by varying the concentration and the temporal availability of individual ions, it has been possible to determine which ions are required specifically for capacitation and for the acrosome reaction. Cations, e.g.  $\text{Ca}^{2+}$ ,  $\text{Na}^{+}$ , have been evaluated more extensively than anions, e.g.  $\text{Cl}^{-}$ ,  $\text{HCO}_3^{-}$ .

Of these ions, the most important appears to be  $\text{Ca}^{2+}$ . Extracellular  $\text{Ca}^{2+}$  is required for both complete capacitation and the acrosome reaction, although there are species- and stage-dependent differences. Relatively little  $\text{Ca}^{2+}$ , i.e. low micromolar concentrations, is required for capacitation in at least some species (e.g. guinea pig, mouse), but millimolar concentrations are required for maximal hyperactivation, acrosome loss and fertilization in all species evaluated (for review see Fraser, 1994, 1995). The requirement for extracellular  $\text{Ca}^{2+}$  reflects a need for internalization of the ion to promote a rise in the intracellular  $\text{Ca}^{2+}$  concentration ( $[\text{Ca}^{2+}]_i$ ).

Capacitation is slow, occurring over a period of hours, while the acrosome reaction is rapid, requiring only minutes. It is therefore not surprising that different mechanisms appear to control changes in  $[\text{Ca}^{2+}]_i$  during these two stages. Indeed, the magnitude of change also differs. Studies using both populations of spermatozoa (e.g. White and

**Table I.** Temporal differences in capacitation and the acrosome reaction necessitate different mechanisms to regulate the intracellular  $\text{Ca}^{2+}$  concentration

|                    |                                                                                   |
|--------------------|-----------------------------------------------------------------------------------|
| Capacitation:      | slow (hours)<br>modest rise in $[\text{Ca}^{2+}]_i$ — $\text{Ca}^{2+}$ -ATPase    |
| Acrosome reaction: | rapid (minutes)<br>large rise in $[\text{Ca}^{2+}]_i$ — $\text{Ca}^{2+}$ channels |

Aitken, 1989; Adeoya-Osiguwa and Fraser, 1993) and individual cells (e.g. Florman, 1994; Suarez and Dai, 1995) have revealed that modest and gradual rises in  $[\text{Ca}^{2+}]_i$  occur during capacitation. In contrast, the acrosome reaction involves a rapid and large influx of  $\text{Ca}^{2+}$  (e.g. Brucker and Lipford, 1995). Since these changes are stage-dependent, differing in both temporal nature and magnitude, it is plausible that the mechanisms controlling the  $\text{Ca}^{2+}$  fluxes may differ. To date, three mechanisms have been identified in mammalian spermatozoa as potential modulators of  $[\text{Ca}^{2+}]_i$ : (i) a  $\text{Ca}^{2+}$ -ATPase acting as a  $\text{Ca}^{2+}$  extrusion pump; (ii) a  $\text{Na}^{+}/\text{Ca}^{2+}$  exchanger promoting a  $\text{Na}^{+}$  out/ $\text{Ca}^{2+}$  in exchange; (iii)  $\text{Ca}^{2+}$  channels allowing  $\text{Ca}^{2+}$  influx.

Of these three, evidence most strongly supports the involvement of  $\text{Ca}^{2+}$ -ATPase during capacitation (Table I). Drugs such as quercetin and ethacrynic acid, known to inhibit somatic cell  $\text{Ca}^{2+}$ -ATPase, have been shown to accelerate capacitation in bull (Fraser *et al.*, 1995), guinea pig (Roldan and Fleming, 1989), human (DasGupta *et al.*, 1994) and mouse (Fraser and McDermott, 1992) spermatozoa. Almost all somatic cell  $\text{Ca}^{2+}$ -ATPases are calmodulin-stimulated (Carafoli, 1992) and treatment of mammalian sperm suspensions with calmodulin inhibitors such as trifluoperazine and W-7 has been shown to stimulate accumulation of  $^{45}\text{Ca}^{2+}$  in uncapacitated mouse spermatozoa (Adeoya-Osiguwa and Fraser, 1993), capacitation in bull (Fraser *et al.*, 1995), human (DasGupta *et al.*, 1994) and mouse (Fraser and McDermott, 1992) spermatozoa and in-vitro fertilizing ability in mouse spermatozoa (Adeoya-Osiguwa and Fraser, 1996). These responses are consistent with the presence in mammalian sperm cells of a calmodulin-stimulated  $\text{Ca}^{2+}$ -ATPase. When active, the enzyme would help maintain a low  $[\text{Ca}^{2+}]_i$  by

extruding  $\text{Ca}^{2+}$ ; a decline in activity during capacitation would result in the gradual and modest rise in  $[\text{Ca}^{2+}]_i$  that has been observed.

There is evidence that a  $\text{Na}^+/\text{Ca}^{2+}$  exchanger is present in mammalian spermatozoa (Fraser, 1994), but little is known about its possible role in capacitation. Caltrin, a low molecular weight protein that associates with bull spermatozoa at the time of ejaculation, has been proposed to modulate  $\text{Na}^+/\text{Ca}^{2+}$  exchanger activity, initially inhibiting it but then stimulating activity to promote  $\text{Na}^+$  out/ $\text{Ca}^{2+}$  in changes (Lardy and San Agustin, 1989). Little evidence exists for such a mechanism operating in other species.

$\text{Ca}^{2+}$  channels have been identified in many mammalian spermatozoa and they do appear to play an important role, but during the acrosome reaction rather than during capacitation. The opening of  $\text{Ca}^{2+}$  channels results in a large, rapid influx of  $\text{Ca}^{2+}$ , consistent with the changes in  $[\text{Ca}^{2+}]_i$  observed during the acrosome reaction (Table I). These are discussed further below.

$\text{Na}^+$  is the most abundant cation in the normal extracellular environment *in vivo* and in culture media used *in vitro*. Although extracellular  $\text{Na}^+$  is required for capacitation and the acrosome reaction, current evidence indicates that relatively little will suffice for capacitation (~25 mM for mouse spermatozoa; Fraser *et al.*, 1993), but much higher concentrations are required for the acrosome reaction and fertilization (>135 mM for the mouse; Fraser *et al.*, 1993). As with  $\text{Ca}^{2+}$ , the requirement for extracellular  $\text{Na}^+$  reflects a need for internalization of  $\text{Na}^+$ . Adding the  $\text{Na}^+$  ionophore monensin to uncapacitated suspensions promotes both capacitation and the acrosome reaction in mouse (Fraser *et al.*, 1993) and human (O'Toole *et al.*, 1996b) spermatozoa.

Two mechanisms have been identified as possible regulators of  $[\text{Na}^+]_i$ , namely a  $\text{Na}^+/\text{K}^+$ -ATPase and a  $\text{Na}^+/\text{Ca}^{2+}$  exchanger. Relatively little experimental evidence has been accumulated to favour either of these. Although ouabain-inhibitable ATPase activity, presumed to be a  $\text{Na}^+/\text{K}^+$ -ATPase, was reported to rise during hamster sperm capacitation (Mrsny *et al.*, 1984), ouabain treatment of uncapacitated mouse sperm suspensions stimulated capacitation (Fraser *et al.*,

1993). These two sets of results are contradictory, the first suggesting that an increase in enzyme activity promotes capacitation, but the second suggesting that a decrease in activity has the same effect. Given that spermatozoa appear to need a rise in  $[\text{Na}^+]_i$ , it is difficult to reconcile a rise in  $\text{Na}^+/\text{K}^+$ -ATPase activity ( $\text{Na}^+$  out,  $\text{K}^+$  in) with a rise in  $[\text{Na}^+]_i$ . Essentially, there is no evidence for the  $\text{Na}^+/\text{Ca}^{2+}$  exchanger regulating  $[\text{Na}^+]_i$ .

One component of capacitation is a rise in intracellular pH ( $\text{pH}_i$ ; e.g. Working and Meizel, 1983; Vredenburg-Wilberg and Parrish, 1995). The requirement for extracellular  $\text{Na}^+$  during capacitation may reflect its involvement in a  $\text{Na}^+$ -,  $\text{Cl}^-$ - and  $\text{HCO}_3^-$ -dependent acid efflux pathway recently proposed to be important in the observed rise in  $\text{pH}_i$  during capacitation and the acrosome reaction in mouse spermatozoa (Zeng *et al.*, 1996). When active, this  $\text{Na}^+$ -dependent pathway would produce  $\text{HCO}_3^-/\text{Cl}^-$  exchange. In contrast to the requirement for extracellular  $\text{Na}^+$  during  $\text{pH}_i$  regulation, there was no obvious requirement for extracellular  $\text{K}^+$ . This is consistent with earlier studies indicating that  $\text{K}^+$  is not needed during capacitation (reviewed by Fraser, 1994).

Current evidence indicates that  $\text{HCO}_3^-$  is required for mammalian sperm capacitation (Neill and Olds-Clarke, 1987; Boatman and Robbins, 1991; Shi and Roldan, 1995; Visconti *et al.*, 1995a; Forsdike and Fraser, 1996), although one study suggested a role only during the acrosome reaction (Lee and Storey, 1986). As with  $\text{Na}^+$ , this may reflect involvement in regulation of  $\text{pH}_i$ .  $\text{HCO}_3^-$  is also known to stimulate mammalian sperm adenylate cyclase (e.g. Okamura *et al.*, 1985) which would promote the generation of cyclic AMP (cAMP). Adenylate cyclase activity increases during capacitation and exogenous analogues of cAMP and/or inhibitors of cyclic nucleotide phosphodiesterases have been shown to accelerate capacitation *in vitro* (reviewed by Fraser and Monks, 1990). The rise in  $[\text{Ca}^{2+}]_i$  during capacitation would also produce a stimulation of adenylate cyclase (Fraser and Monks, 1990). Consistent with these observations, recent studies on capacitation *in vitro* of mouse spermatozoa have indicated a time-dependent increase in protein tyrosine phosphorylation during capacitation (Visconti

*et al.*, 1995a), this phosphorylation and thus capacitation apparently being regulated by cAMP and protein kinase A (Visconti *et al.*, 1995b).

### Decapacitation factors

Capacitation involves considerable alteration in the sperm surface, with various molecules being lost, rearranged or unmasked (e.g. Oliphant *et al.*, 1985). Those belonging to the first category are often referred to as 'decapacitation factors' (DF) because their addition to capacitated suspensions will rapidly inhibit fertilizing ability (Bedford and Chang, 1962). This inhibition is reversible, such that further incubation of cells under capacitating conditions will result in restored fertility. Thus, capacitation itself appears to be reversible, whereas the acrosome reaction, involving membrane vesiculation and loss, is irreversible. DF may be of either epididymal or seminal plasma origin and represent a mechanism for preventing the spermatozoa from becoming fertile too quickly.

In the mouse, we have been investigating a DF of epididymal origin. Since epididymal and ejaculated mouse spermatozoa exhibit similar capacitation kinetics, i.e. there appears to be no detectable additional inhibition resulting from contact with seminal plasma, this DF may be a major regulator of capacitation in the mouse. Removal of the DF from uncapacitated cells by centrifugation stimulates fertilizing ability *in vitro* and its re-addition to capacitated suspensions causes a significant reversal from the capacitated to the uncapacitated state (assessed using the chlortetracycline fluorescence assay) and inhibits fertilizing ability (Fraser, 1984; Fraser *et al.*, 1990).

Based on indirect evidence that a  $\text{Ca}^{2+}$ -ATPase is involved in controlling  $[\text{Ca}^{2+}]_i$  during capacitation (see above), we have postulated that the DF modulates capacitation by regulating  $\text{Ca}^{2+}$ -ATPase activity associated with the plasma membrane. Using a  $[\gamma\text{-}^{32}\text{P}]\text{ATP}$  hydrolysis assay to determine ATPase activity and membranes prepared from isolated mouse sperm heads and tails, we now have obtained direct evidence for the presence of a  $\text{Ca}^{2+}$ -dependent ATPase in head membranes that is further stimulated by calmodulin and partially purified DF, used individually and in combination (Adeoya-Osiguwa and Fraser, 1996). Furthermore, the addi-

tion of exogenous DF to cells depleted of their endogenous DF significantly inhibited the accumulation of  $^{45}\text{Ca}^{2+}$  by intact cells and caused a temporary reversal from the capacitated to the uncapacitated state as determined using chlortetracycline fluorescence analysis (Adeoya-Osiguwa and Fraser, 1996).

Taking into account both indirect and direct experimental evidence, we have proposed that the association of this epididymally derived DF with the mouse sperm plasma membrane stimulates the endogenous activity of a calmodulin-stimulated  $\text{Ca}^{2+}$ -ATPase, resulting in a low  $[\text{Ca}^{2+}]_i$ . Following ejaculation into the female reproductive tract or release into culture medium, the DF begins to dissociate or to undergo inactivation and  $\text{Ca}^{2+}$ -ATPase activity declines, allowing  $[\text{Ca}^{2+}]_i$  to rise modestly and promote capacitation. Inhibitors known to affect somatic cell  $\text{Ca}^{2+}$ -ATPase can stimulate capacitation in several mammalian species (see above), and the addition of mouse DF to capacitated human sperm suspensions can cause a reversal of capacitation (shown using chlortetracycline; DasGupta *et al.*, 1994), suggesting that modulation of  $\text{Ca}^{2+}$ -ATPase may be a mechanism for regulating  $[\text{Ca}^{2+}]_i$  during capacitation in many, or possibly all, mammalian spermatozoa.

### Fertilization promoting peptide

While DF present on spermatozoa at ejaculation provide an inhibitory mechanism to prevent premature acquisition of fertilizing ability, there is evidence that stimulatory mechanisms also come into play at the time of ejaculation. Under normal circumstances, the interplay of these opposing mechanisms could optimize the timing of the acquisition of fertilizing potential within the female tract.

A tripeptide (pyroglutamylglutamylprolineamide) that is structurally similar to thyrotrophin-releasing hormone (TRH; pyroglutamylhistidylprolineamide) has been identified in a number of mammalian tissues, including the prostate and the pituitary gland (Ashworth, 1994). It is also found in seminal plasma (e.g. mean  $\pm$  SEM concentration in human,  $49.5 \pm 10.3$  nM; Cockle *et al.*, 1994), suggestive of a possible biological function relating to spermatozoa. In recent studies we have provided

**Table II.** FPP regulates mammalian sperm function**Stimulatory effects on uncapacitated spermatozoa**

Capacitation (CTC)  
Hyperactivation (CASA)  
Fertilizing ability (IVF, HOPT)

**Inhibitory effects on capacitated spermatozoa**

Spontaneous acrosome reaction (CTC)  
Not agonist-induced acrosome reaction (CTC)

FPP = fertilization promoting peptide; CTC = chlortetracycline; CASA = computer-assisted sperm analysis; IVF = in-vitro fertilization; HOPT = zona-free hamster oocyte penetration test.

the first evidence for a physiologically relevant action for this tripeptide, demonstrating that its addition to uncapacitated mouse and human sperm suspensions promotes both capacitation (chlortetracycline fluorescence assay) and fertilizing ability *in vitro* (Green *et al.*, 1994, 1996b). Using computer-assisted sperm analysis, we have also demonstrated that the peptide stimulates hyperactivated motility in mouse spermatozoa (Green *et al.*, 1996a; Table II). Consequently, we have proposed that the peptide should be known as fertilization promoting peptide (FPP).

In our most recent studies (Green *et al.*, 1996c), we have sought clues to the possible mechanism of action involved in FPP-elicited responses. We now have demonstrated that FPP stimulation of capacitation requires extracellular  $\text{Ca}^{2+}$ . Interestingly, although FPP stimulates uncapacitated cells, we also observed that addition of FPP to capacitated suspensions inhibited spontaneous acrosome reactions in mouse spermatozoa. Because earlier studies (e.g. Monks *et al.*, 1986) had identified similar biphasic, capacitation-related changes in responses to adenosine, i.e. stimulatory early in capacitation and inhibitory later, we investigated the possibility that both FPP and adenosine might act via the same pathway. When FPP and adenosine were used in combination with uncapacitated mouse sperm suspensions, both at low non-stimulatory and high stimulatory concentrations, the response was greater than with either compound alone, suggesting that they are affecting a common pathway but initiating responses independently. We also observed that adenosine, like FPP, inhibited

acrosome loss in capacitated cells (Green *et al.*, 1996c).

One of the most interesting and relevant experimental observations was that while FPP and adenosine each inhibited spontaneous acrosome loss in capacitated suspensions, the cells were still able to undergo an acrosome reaction in response to progesterone, a physiological agonist of the exocytotic response (Table II). Since adenosine, acting via specific cell surface receptors, has been shown to stimulate adenylate cyclase activity (Fraser and Duncan, 1993) and fertilizing ability (Fraser, 1990) in uncapacitated mouse spermatozoa, yet inhibit adenylate cyclase activity in capacitated cells (Monks *et al.*, 1986), we have proposed that FPP also acts via the adenylate cyclase/cAMP signal transduction pathway. This is consistent with the recent demonstration of a time-dependent, cAMP-regulated increase in tyrosine phosphorylation of several proteins during capacitation *in vitro* of mouse spermatozoa (Visconti *et al.*, 1995a,b). Furthermore, Fénelichel *et al.* (1996) have reported that an adenosine analogue stimulated protein tyrosine phosphorylation in uncapacitated human sperm suspensions and inhibited it in capacitated suspensions.

We have proposed (Green *et al.*, 1996b,c) that FPP binds to sperm cells at ejaculation and then remains bound, exerting a stimulatory effect on capacitation as spermatozoa ascend the female tract. Adenosine is also present in seminal plasma (Fabiani and Ronquist, 1995) and body fluids (Fredholm *et al.*, 1983). This availability of adenosine would allow it to augment FPP action and even to replace it if FPP is lost from the cell surface. We therefore have suggested (Green *et al.*, 1996c) that FPP and adenosine, by modulating adenylate cyclase activity, provide an endogenous mechanism to promote capacitation but inhibit spontaneous acrosome loss and thus help to optimize the fertilizing potential of the few spermatozoa that reach the site of fertilization *in vivo*.

**Ionic regulation of the acrosome reaction**

The acrosome reaction during normal fertilization is  $\text{Ca}^{2+}$ -dependent, with millimolar concentrations in the extracellular environment being required for a maximal response (Fraser, 1994; Brucker and

Lipford, 1995). Molecules associated with oocytes and their investments act as agonists to trigger the acrosome reaction, one of the early responses in the complicated sequence of events being a rise in  $[Ca^{2+}]_i$ . There is now considerable evidence that zona glycoproteins (ZP) provide the signal, with ZP3 being the relevant molecule in the mouse (Ward and Kopf, 1993); related molecules appear able to initiate similar responses in other species. Progesterone, a component of follicular fluid produced by granulosa and cumulus cells, has also been shown to stimulate a rise in  $[Ca^{2+}]_i$  and the acrosome reaction, first in human spermatozoa (Thomas and Meizel, 1989; Blackmore *et al.*, 1990) and more recently in other species, including the pig (Melendrez *et al.*, 1994) and mouse (Roldan *et al.*, 1994). This response appears to involve progesterone interacting with a non-genomic receptor located on the sperm head (reviewed by Revelli *et al.*, 1994).

Considerable evidence obtained during the past decade indicates that the rise in  $[Ca^{2+}]_i$  during the acrosome reaction is due to  $Ca^{2+}$  influx via  $Ca^{2+}$  channels with properties similar to the voltage-sensitive L-type channels identified in vertebrate skeletal and cardiac muscle (e.g. Florman *et al.*, 1992; Fraser, 1993; Florman, 1994; O'Toole *et al.*, 1996b). Binding sites for  $Ca^{2+}$  channel antagonists such as dihydropyridines and phenylalkylamines have been identified (Florman *et al.*, 1992). Acrosome reactions in response to solubilized zona proteins (Florman *et al.*, 1992) and progesterone (Shi and Roldan, 1995; O'Toole *et al.*, 1996b) can be inhibited significantly by similar  $Ca^{2+}$  channel antagonists. A few studies on mammalian spermatozoa have also detected the presence of voltage-sensitive  $Ca^{2+}$ -conducting channels (e.g. Cox *et al.*, 1991; Beltran *et al.*, 1994).

Another ion that is important during the acrosome reaction is  $Na^+$ , with a large influx being associated with the exocytotic response. The  $Na^+$  ionophore monensin can trigger the acrosome reaction readily in both mouse (Fraser *et al.*, 1993) and human spermatozoa (O'Toole *et al.*, 1996b) in medium with a high millimolar  $Na^+$  concentration but not in mouse spermatozoa in a medium with a low  $Na^+$  concentration. Consistent with these observations, fertilization *in vitro* in the

mouse required a high  $Na^+$  concentration (Fraser *et al.*, 1993), and the removal of extracellular  $Na^+$  from capacitated human sperm suspensions significantly inhibited progesterone-induced acrosome loss (Garcia and Meizel, 1994).

This requirement for extracellular  $Na^+$  during the acrosome reaction could reflect its involvement in the rise in  $pH_i$  known to occur during agonist-induced acrosome loss. It has been suggested that  $Na^+$  again is important for the functioning of a  $Na^+$ -,  $Cl^-$ - and  $HCO_3^-$ -dependent acid efflux pathway, where all ions are required to be present, that has been detected in mouse spermatozoa (Zeng *et al.*, 1996). However, two studies (Shi and Roldan, 1995; L.Fraser *et al.*, unpublished results) have provided evidence that  $HCO_3^-$  is not required for the progesterone-stimulated acrosome reaction in mouse spermatozoa. The alternative possibility that  $Na^+$  might be important in  $Na^+/H^+$  exchange as a mechanism for promoting a rise in  $pH_i$  has been suggested (Fraser *et al.*, 1993). Even though the work of Zeng *et al.* (1996) found little evidence for the functioning of this exchange mechanism during regulation of  $pH_i$ , it would be consistent with experimental evidence indicating a requirement for  $Na^+$  but not for  $HCO_3^-$  during the acrosome reaction.

Following the initial interaction between spermatozoa and ZP3 or progesterone, there are many individual steps in the sequence that culminate in the actual exocytosis of the acrosome. Knowing that the opening of  $Ca^{2+}$  channels is one of these steps, it is possible to determine whether other events occur before or after the activation of  $Ca^{2+}$  channels. Current evidence indicates that  $Na^+$  influx precedes the  $Ca^{2+}$  influx, since the acrosome reaction stimulated by monensin can be blocked by the prior inclusion of nanomolar concentrations of dihydropyridine  $Ca^{2+}$  channel antagonists such as nifedipine (human: O'Toole *et al.*, 1996b; mouse: Fraser, 1993).

An important consequence of  $Ca^{2+}$  channel opening and the resulting rise in  $[Ca^{2+}]_i$  is the activation of polyphosphoinositide-specific phosphoinositidase C (PIC). Although PIC is also a phospholipase C (PLC), it is less confusing if PLC is used to denote the enzyme that hydrolyses phospholipids other than polyphosphoinositides.

Activation of PIC leads to hydrolysis of phosphatidylinositol 4,5-bisphosphate to produce inositol 1,4,5-trisphosphate ( $\text{InsP}_3$ ), which stimulates release of stored intracellular  $\text{Ca}^{2+}$ , and diacylglycerol (DAG), which generally activates protein kinase C (Berridge, 1993). DAG can also be generated following the activation of other phospholipases, including PLC and the phospholipase D (PLD)/phosphatidic acid phosphohydrolase pathway (Exton, 1990, 1994).

Studies on mammalian spermatozoa have shown that PIC-mediated hydrolysis of membrane polyphosphoinositides is an important early event in the acrosome reaction (Roldan and Harrison, 1989; Thomas and Meizel, 1989). Current evidence suggests that  $\text{InsP}_3$  does not appear to play a role in the acrosome reaction (Harrison *et al.*, 1990), but that DAG does (Roldan and Harrison, 1992; O'Toole *et al.*, 1996a). In human spermatozoa, although PIC activity is required to initiate DAG production, much of the DAG formed in response to either progesterone or the  $\text{Ca}^{2+}$  ionophore A23187 is generated by the PLC pathway, with little evidence for PLD pathway involvement (O'Toole *et al.*, 1996a). This DAG production occurs downstream of  $\text{Ca}^{2+}$  channel opening, since the inclusion of nifedipine not only blocks the endpoint of exocytosis but also the generation of DAG (O'Toole *et al.*, 1996b). Exogenous DAG will induce the acrosome reaction, but only in capacitated cells (determined using chlortetracycline); the fact that inclusion of nifedipine does not block this response is consistent with DAG formation and action during the acrosome reaction occurring after  $\text{Ca}^{2+}$  channel opening (O'Toole, 1996b).

In somatic cells, DAG activates protein kinase C (PKC; Berridge, 1993), but an unequivocal role for PKC during the acrosome reaction has yet to be demonstrated. PKC activity in sperm cells is much lower than in somatic cells (Rotem *et al.*, 1990). Indirect evidence, obtained using various activators and inhibitors of PKC, has suggested that the enzyme may function during the acrosome reaction (e.g. DeJonge *et al.*, 1991; Breitbart *et al.*, 1992; Rotem *et al.*, 1992). More direct evidence is needed before firm conclusions can be drawn regarding PKC participation in events culminating in acrosomal exocytosis.

## Conclusions

Both capacitation and the acrosome reaction involve a very complicated sequence of events (Table III), with the ionic composition of the external environment playing a crucial role in controlling the acquisition and expression of fertilizing potential. The requirements for extracellular ions such as  $\text{Ca}^{2+}$  and  $\text{Na}^+$  reflect a need for changes in the intracellular concentration of these ions during the acquisition of fertilizing ability. In the absence of sufficient extracellular ions, sperm function will be inhibited. However, considerable evidence indicates that some men produce spermatozoa that are defective and hence unable to respond appropriately, even in an optimal environment. In some instances, these defective cells may be unable to undergo capacitation and, consequently, unable to undergo the acrosome reaction and interact successfully with the oocyte. In others, the defects may affect only the events associated with the acrosome reaction; for example, some spermatozoa cannot undergo an acrosome reaction in response to the influx of  $\text{Ca}^{2+}$  stimulated by the  $\text{Ca}^{2+}$  ionophore A23187, a treatment which bypasses the normal signal transduction pathways that trigger a rapid rise in  $[\text{Ca}^{2+}]_i$  (Cummins, 1994).

Where they function correctly, the mechanisms that control both capacitation and the acrosome reaction help to ensure that potentially fertilizing spermatozoa reach the site of fertilization *in vivo*. These cells have lost their DF, acquired hyperactivated motility and, although apparently being inhibited from undergoing spontaneous acrosome loss by FPP and/or adenosine, are able to undergo the acrosome reaction in response to the oocyte and its associated investments. Thus, all of these complex steps can be seen to provide a delivery mechanism for depositing the spermatozoon's genetic payload in the oocyte cytoplasm and, at the same time, activating the oocyte's metabolism, both events being crucial to normal development. The fact that intracytoplasmic sperm injection (ICSI), using uncapacitated and acrosome-intact spermatozoa, is successful proves that the genetic information carried by these cells is fully competent to support complete development once it has reached the oocyte's cytoplasm. However, it is important to remember that during capacitation and the acro-

Table III. Mechanisms regulating capacitation and the acrosome reaction

| Mechanism                  | Modulator                                                                  | Capacitation | Acrosome reaction |
|----------------------------|----------------------------------------------------------------------------|--------------|-------------------|
| Ca <sup>2+</sup> -ATPase↓  | DF                                                                         | +            | -                 |
| Adenylate cyclase↑/↓       | FPP/adenosine                                                              | +            | -                 |
| pH <sub>i</sub> ↑          | Na <sup>+</sup> , Cl <sup>-</sup> , HCO <sub>3</sub> <sup>-</sup>          | +            | -                 |
|                            | ZP3 plus Na <sup>+</sup> , Cl <sup>-</sup> , HCO <sub>3</sub> <sup>-</sup> | -            | +                 |
| Ca <sup>2+</sup> channels↑ | ZP3/progesterone (indirect)                                                | -            | +                 |
| PIC↑ → DAG↑                | [Ca <sup>2+</sup> ] <sub>i</sub> ↑ (Ca <sup>2+</sup> channels)             | -            | +                 |

↑, ↓ = increase or decrease in activity or concentration respectively.  
DF = decapacitation factor; FPP = fertilization promoting peptide; ZP3 = zona glycoprotein 3; PIC = phosphoinositidase C; DAG = diacylglycerol.

some reaction *in vivo*, only a very small proportion of the spermatozoa in the ejaculate will reach the site of fertilization in a physiologically appropriate state to be able to fertilize an oocyte, if present. Thus, *in vivo* there are a number of selective pressures placed on the initial population of spermatozoa and these may be important in helping to select the ‘fittest’ spermatozoa for fertilization. No such selection is imposed on the spermatozoa used for ICSI. Therefore, it is of utmost importance to monitor carefully the development, throughout childhood and into adulthood, of individuals born as a result of ICSI. Indeed, since at present we have no way of identifying ‘fit’ spermatozoa, it would be best to use ICSI only in cases where the spermatozoa are judged to be incapable of achieving normal fertilization *in vitro*, rather than using ICSI as the first choice of treatment in all or most cases.

Acknowledgements

Recent original research in the author’s laboratory has been supported by the Biotechnology and Biological Sciences Research Council, the Bourn-Hallam Group and the Wellcome Trust.

References

Adeoya-Osiguwa, S. and Fraser, L.R. (1993) A biphasic pattern of <sup>45</sup>Ca<sup>2+</sup> uptake by mouse spermatozoa *in vitro* correlates with changing functional potential. *J. Reprod. Fertil.*, **99**, 187–194.  
Adeoya-Osiguwa, S. and Fraser, L.R. (1996) Evidence for Ca<sup>2+</sup>-dependent ATPase activity, stimulated by decapacitation factor and calmodulin, in mouse sperm. *Mol. Reprod. Dev.*, **44**, 111–120.  
Ashworth, R.J. (1994) Thyrotropin-releasing hormone

(TRH)-related peptides. *Mol. Cell. Endocrinol.*, **101**, C1–C3.  
Austin, C.R. (1951) Observation on the penetration of sperm into the mammalian egg. *Aust. J. Sci. Res.*, **B4**, 697–698.  
Austin, C.R. (1952) The ‘capacitation’ of the mammalian sperm. *Nature*, **170**, 326.  
Bedford, J.M. and Chang, M.C. (1962) Removal of decapacitation factor from seminal plasma by high speed centrifugation. *Am. J. Physiol.*, **202**, 179–181.  
Beltran, C., Darszon, A., Labarca, P. and Lievano, A. (1994) A high-conductance voltage-dependent multistate Ca<sup>2+</sup> channel found in sea urchin and mouse spermatozoa. *FEBS Lett.*, **338**, 23–26.  
Berridge, M. (1993) Inositol trisphosphate and calcium signalling. *Nature*, **361**, 315–325.  
Boatman, D.E. and Robbins, R.S. (1991) Bicarbonate: carbon-dioxide regulation of sperm capacitation, hyperactivated motility, and acrosome reactions. *Biol. Reprod.*, **44**, 806–813.  
Breitbart, H., Lax, J., Rotem, R. and Naor, Z. (1992) Role of protein kinase C in the acrosome reaction of mammalian spermatozoa. *Biochem. J.*, **281**, 473–476.  
Brucker, L. and Lipford, G.B. (1995) The human sperm acrosome reaction: physiology and regulatory mechanisms. An update. *Hum. Reprod. Update*, **1**, 57–62.  
Carafoli, E. (1991) Calcium pump of the plasma membrane. *Physiol. Rev.*, **71**, 129–153.  
Chang, M.C. (1951) Fertilizing capacity of spermatozoa deposited in the fallopian tubes. *Nature*, **168**, 697–698.  
Cockle, S.M., Prater, G.V., Thetford, C.R. *et al.* (1994) Peptides related to thyrotrophin-releasing hormone (TRH) in the human prostate and semen. *Biochim. Biophys. Acta*, **1227**, 60–66.  
Cox, T., Campbell, P. and Peterson, R.N. (1991) Ion channels in boar sperm plasma membranes: characterization of a cation selective channel. *Mol. Reprod. Dev.*, **30**, 135–147.



- Cummins, J. (1994) Diagnostic use and techniques of acrosome reaction evaluation. In Tesarik, J. (ed.), *Male Factor in Human Infertility*. Ares-Serono Symposia Publications, Rome. *Front. Endocrinol.*, **8**, 101–153.
- DasGupta, S., Mills, C.L. and Fraser, L.R. (1994) A possible role for  $\text{Ca}^{2+}$ -ATPase in human sperm capacitation. *J. Reprod. Fertil.*, **102**, 107–116.
- DeJonge, C.J., Han, H.-L., Mack, S.R. and Zaneveld, L.J.D. (1991) Effect of phorbol diester, synthetic diacylglycerols, and a protein kinase C inhibitor on the human sperm acrosome reaction. *J. Androl.*, **12**, 62–70.
- DeMott, R.P. and Suarez, S.S. (1992) Hyperactivated sperm progress in the mouse oviduct. *Biol. Reprod.*, **46**, 779–785.
- Exton, J.H. (1990) Signaling through phosphatidylcholine breakdown. *J. Biol. Chem.*, **265**, 1–4.
- Exton, J.H. (1994) Phosphatidylcholine breakdown and signal transduction. *Biochim. Biophys. Acta*, **1212**, 26–42.
- Fabiani, R. and Ronquist, G. (1995) Abundance of guanine, guanosine, inosine and adenosine in human seminal plasma. *Int. J. Clin. Lab. Res.*, **25**, 47–51.
- Fénichel, P., Gharib, A., Emiliozzi, C. et al. (1996) Stimulation of human sperm capacitation in vitro by an adenosine agonist with specificity for  $\text{A}_2$  receptors. *Biol. Reprod.*, **54**, 1405–1411.
- Florman, H.M. (1994) Sequential focal and global elevations of sperm intracellular  $\text{Ca}^{2+}$  are initiated by the zona pellucida during acrosomal exocytosis. *Dev. Biol.*, **165**, 152–164.
- Florman, H.M., Corron, M.E., Kim, T.D.-H. and Babcock, D.F. (1992) Activation of voltage-dependent calcium channels of mammalian sperm is required for zona pellucida-induced acrosomal exocytosis. *Dev. Biol.*, **152**, 304–314.
- Forsdike, R.A. and Fraser, L.R. (1996) Relative importance of  $\text{Ca}^{2+}$  and  $\text{HCO}_3^-$  for capacitation and acrosomal exocytosis in mouse spermatozoa. *J. Reprod. Fertil. Abstr. Ser.*, **17**, 4.
- Fraser, L.R. (1984) Mouse sperm capacitation *in vitro* involves loss of a surface-associated inhibitory component. *J. Reprod. Fertil.*, **72**, 373–384.
- Fraser, L.R. (1990) Adenosine and its analogues, possibly acting at  $\text{A}_2$  receptors, stimulate mouse sperm fertilizing ability during early stages of capacitation. *J. Reprod. Fertil.*, **89**, 463–476.
- Fraser, L.R. (1993) Calcium channels play a pivotal role in the sequence of ionic changes involved in initiation of mouse sperm acrosomal exocytosis. *Mol. Reprod. Dev.*, **36**, 368–379.
- Fraser, L.R. (1994)  $\text{Na}^+$  requirements for capacitation and acrosomal exocytosis in mammalian sperm. *Int. Rev. Cytol.*, **149**, 1–46.
- Fraser, L.R. (1995) Ionic control of sperm function. *Reprod. Fertil. Dev.*, **7**, 905–925.
- Fraser, L.R. and Duncan, A.E. (1993) Adenosine analogues with specificity for  $\text{A}_2$  receptors bind to mouse spermatozoa and stimulate adenylate cyclase activity in uncapacitated suspensions. *J. Reprod. Fertil.*, **98**, 187–194.
- Fraser, L.R. and McDermott, C.A. (1992)  $\text{Ca}^{2+}$ -related changes in the mouse sperm capacitation state: a possible role for  $\text{Ca}^{2+}$ -ATPase. *J. Reprod. Fertil.*, **96**, 363–377.
- Fraser, L.R. and Monks, N.J. (1990) Cyclic nucleotides and mammalian sperm capacitation. *J. Reprod. Fertil. Suppl.*, **42**, 9–21.
- Fraser, L.R., Harrison, R.A.P. and Herod, J.E. (1990) Characterization of a decapacitation factor associated with epididymal mouse spermatozoa. *J. Reprod. Fertil.*, **89**, 135–148.
- Fraser, L.R., Umar, G. and Sayed, S. (1993)  $\text{Na}^+$ -requiring mechanisms modulate capacitation and acrosomal exocytosis in mouse spermatozoa. *J. Reprod. Fertil.*, **97**, 539–549.
- Fraser, L.R., Abeydeera, L.R. and Niwa, K. (1995)  $\text{Ca}^{2+}$ -regulating mechanisms that modulate bull sperm capacitation and acrosomal exocytosis as determined by chlortetracycline analysis. *Mol. Reprod. Dev.*, **40**, 233–241.
- Fredholm, B.B., Gustafsson, L.E., Hedqvist, P. and Sollevi, A. (1983) Adenosine in the regulation of neurotransmitter release in the peripheral nervous system. In Berne, R.M., Rall, T.W. and Rubio, R. (eds), *Regulatory Function of Adenosine*. Martinus Nijhoff Publishers, The Hague, pp. 479–495.
- Garcia, M.A. and Meizel, S. (1994) Effects of sodium ion on the progesterone-initiated calcium influx and acrosome reaction in human sperm. *Biol. Reprod.*, **50** (Suppl. 1), 105.
- Green, C.M., Cockle, S.M., Watson, P.F. and Fraser, L.R. (1994) Stimulating effect of pyroglutamylglutamylprolineamide, a prostatic, TRH-related tripeptide, on mouse sperm capacitation and fertilizing ability *in vitro*. *Mol. Reprod. Dev.*, **38**, 215–221.
- Green, C.M., Cockle, S.M., Fraser, L.R. and Watson, P.F. (1996a) The effect of FPP on the motile characteristics of mouse spermatozoa. *J. Reprod. Fertil. Abstr. Ser.*, **17**, 31.
- Green, C.M., Cockle, S.M., Watson, P.F. and Fraser, L.R. (1996b) Fertilization promoting peptide, a TRH-like peptide, stimulates capacitation and fertilizing ability of human spermatozoa *in vitro*. *Hum. Reprod.*, **11**, 830–836.
- Green, C.M., Cockle, S.M., Watson, P.F. and Fraser, L.R. (1996c) Possible mechanism of action for fertilization promoting peptide, a TRH-related tripeptide that promotes capacitation and fertilizing ability in mammalian spermatozoa. *Mol. Reprod. Dev.*, **45**, 244–252.
- Harrison, R.A.P., Roldan, E.R.S., Lander, D.J. and

- Irvine, R.F. (1990) Ram spermatozoa produce inositol 1,4,5 trisphosphate but not inositol 1,3,4,5 tetrakisphosphate during the  $\text{Ca}^{2+}$ /ionophore-induced acrosome reaction. *Cell Signalling*, **2**, 277–284.
- Katz, D.F., Yanagimachi, R. and Dresdner, R.D. (1978) Movement characteristics and power output of guinea-pig and hamster spermatozoa in relation to activation. *J. Reprod. Fertil.*, **52**, 167–172.
- Lardy, H. and San Agustín, J. (1989) Caltrin and calcium regulation of sperm activity. In Schatten, H. and Schatten, G. (eds), *The Cell Biology of Fertilization*. Academic Press, New York, pp. 29–39.
- Lee, M.A. and Storey, B.T. (1986) Bicarbonate is essential for fertilization of mouse eggs: mouse sperm require it to undergo the acrosome reaction. *Biol. Reprod.*, **34**, 349–356.
- Melendrez, C.S., Meizel, S. and Berger, T. (1994) Comparison of the ability of progesterone and heat solubilized porcine zona pellucida to initiate the porcine sperm acrosome *in vitro*. *Mol. Reprod. Dev.*, **39**, 433–438.
- Monks, N.J., Stein, D.M. and Fraser, L.R. (1986) Adenylate cyclase activity of mouse sperm during capacitation *in vitro*: effect of calcium and a GTP analogue. *Int. J. Androl.*, **9**, 67–76.
- Mrsny, R.J., Siiteri, J.E. and Meizel, S. (1984) Hamster sperm  $\text{Na}^+$ ,  $\text{K}^+$ -adenosine triphosphatase: increased activity during capacitation *in vitro* and its relationship to cyclic nucleotides. *Biol. Reprod.*, **30**, 573–584.
- Neill, J.M. and Olds-Clarke, P. (1987) A computer-assisted assay for mouse sperm hyperactivation demonstrates that bicarbonate but not bovine serum albumin is required. *Gamete Res.*, **18**, 121–140.
- O'Toole, C.M.B., Roldan, E.R.S. and Fraser, L.R. (1996a) A role for diacylglycerol in human sperm acrosomal exocytosis. *Mol. Hum. Reprod.*, **2**, 317–326.
- O'Toole, C.M.B., Roldan, E.R.S. and Fraser, L.R. (1996b) Role for  $\text{Ca}^{2+}$  channels in the signal transduction pathway leading to acrosomal exocytosis in human spermatozoa. *Mol. Reprod. Dev.*, **45**, 204–211.
- Okamura, N., Tajima, Y., Soejima, A. *et al.* (1985) Sodium bicarbonate in seminal plasma stimulates the motility of mammalian spermatozoa through direct activation of adenylate cyclase. *J. Biol. Chem.*, **260**, 9699–9705.
- Oliphant, G., Reynolds, A.B. and Thomas, T.S. (1985) Sperm surface components involved in the control of the acrosome reaction. *Am. J. Anat.*, **174**, 269–283.
- Revelli, A., Modotti, M., Pittaretti-Yanez, A. *et al.* (1994) Steroid receptors in human spermatozoa. *Hum. Reprod.*, **9**, 760–766.
- Roldan, E.R.S. and Fleming, A.D. (1989) Is a  $\text{Ca}^{2+}$ -ATPase involved in  $\text{Ca}^{2+}$  regulation during capacitation and the acrosome reaction of guinea-pig spermatozoa? *J. Reprod. Fertil.*, **85**, 297–308.
- Roldan, E.R.S. and Harrison, R.A.P. (1989) Polyphosphoinositide breakdown and subsequent exocytosis in the  $\text{Ca}^{2+}$  ionophore induced acrosome reaction of mammalian spermatozoa. *Biochem. J.*, **259**, 397–406.
- Roldan, E.R.S. and Harrison, R.A.P. (1992) The role of diacylglycerol in the exocytosis of the sperm acrosome. Studies using diacylglycerol lipase and diacylglycerol kinase inhibitors and exogenous diacylglycerols. *Biochem. J.*, **281**, 767–773.
- Roldan, E.R.S., Murase, T. and Shi, Q.-X. (1994) Exocytosis in spermatozoa in response to progesterone and zona pellucida. *Science*, **266**, 1578–1581.
- Rotem, R., Paz, G.F., Homonnai, Z.T. *et al.* (1990) Protein kinase C is present in human sperm: possible role in flagellar motility. *Proc. Natl. Acad. Sci. USA*, **87**, 7305–7308.
- Rotem, R., Paz, G.F., Homonnai, Z.T. *et al.* (1992)  $\text{Ca}^{2+}$ -independent induction of acrosome reaction by protein kinase C in human sperm. *Endocrinology*, **131**, 2235–2243.
- Shi, Q.X. and Roldan, E.R.S. (1995) Evidence that a  $\text{GABA}_A$ -like receptor is involved in progesterone-induced acrosomal exocytosis in mouse spermatozoa. *Biol. Reprod.*, **52**, 373–381.
- Suarez, S.S. and Dai, X. (1995) Intracellular calcium reaches different levels of elevation in hyperactivated and acrosome-reacted hamster sperm. *Mol. Reprod. Dev.*, **42**, 325–333.
- Thomas, P. and Meizel, S. (1989) Phosphatidylinositol 4,5-bisphosphate hydrolysis in human sperm stimulated with follicular fluid or progesterone is dependent upon  $\text{Ca}^{2+}$  influx. *Biochem. J.*, **264**, 539–546.
- Visconti, P.E., Bailey, J.L., Moore, G.D. *et al.* (1995a): Capacitation of mouse spermatozoa. I. Correlation between the capacitation state and protein tyrosine phosphorylation. *Development*, **121**, 1129–1137.
- Visconti, P.E., Moore, G.D., Bailey, J.L. *et al.* (1995b) Capacitation of mouse spermatozoa. II. Protein tyrosine phosphorylation and capacitation are regulated by a cAMP-dependent pathway. *Development*, **121**, 1139–1150.
- Vredenburg-Wilberg, W.L. and Parrish, J.J. (1995) Intracellular pH of bovine sperm increases during capacitation. *Mol. Reprod. Dev.*, **40**, 490–502.
- Ward, C.R. and Kopf, G.S. (1993) Molecular events mediating sperm activation. *Dev. Biol.*, **158**, 9–34.
- White, D.R. and Aitken, R.J. (1989) Relationship between calcium, cyclic AMP, ATP and intracellular pH and the capacity of hamster spermatozoa to express hyperactivated motility. *Gamete Res.*, **22**, 163–177.
- Working, P.K. and Meizel, S. (1983) Correlation of

- increased intraacrosomal pH with the hamster sperm acrosome reaction. *J. Exp. Zool.*, **227**, 97–107.
- Yanagimachi, R. (1994) Mammalian fertilization. In Knobil, E. and Neill, J.D. (eds), *The Physiology of Reproduction*, 2nd edn. Raven Press, New York, pp. 189–317.
- Zeng, Y., Oberdorf, J.A. and Florman, H.M. (1996) pH regulation in mouse sperm: identification of  $\text{Na}^+$ ,  $\text{Cl}^-$  and  $\text{HCO}_3^-$ -dependent and arylaminobenzoate-dependent regulatory mechanisms and characterization of their roles in sperm capacitation. *Dev. Biol.*, **173**, 510–520.
